# Supplementary material for: Fine-tuning the architecture of microgels by varying the initiator addition time
Source: Royal Society of Chemistry journal article supplement (doi:10.1039/d4sm01200c), 2025-01-01
Supplement: d4sm01200c1.pdf [file d4sm01200c1.pdf]

# Fine-tuning the architecture of microgels by varying the initiator addition time

## Supplementary Information

Elena Buratti,<sup>†</sup> Fabrizio Camerin,<sup>‡</sup> Valentina Nigro,<sup>¶</sup> Silvia Franco,<sup>§,||</sup> José Ruiz-Franco,<sup>⊥,#</sup> Lionel Porcar,<sup>@</sup> Roberta Angelini,<sup>§,||</sup> Barbara Ruzicka,<sup>§,||</sup> Yuri Gerelli,<sup>§,||</sup> and Emanuela Zaccarelli<sup>\*,§,||</sup>

<sup>†</sup>*Department of Chemical, Pharmaceutical and Agricultural Sciences, University of Ferrara, via L. Borsari 46, 44121 Ferrara, Italy*

<sup>‡</sup>*Physical Chemistry, Department of Chemistry, Lund University, SE-22100 Lund, Sweden*

<sup>¶</sup>*Photonics Micro and Nanostructures Laboratory, ENEA Frascati Research Centre, Via E. Fermi 45, 00044 Frascati, Italy*

<sup>§</sup>*Italian National Research Council - Institute for Complex Systems (CNR-ISC), Sapienza University of Rome, Piazzale Aldo Moro 5, 00185 Rome, Italy*

<sup>||</sup>*Department of Physics, Sapienza University of Rome, P.le A. Moro 2, 00185 Roma, Italy*

<sup>⊥</sup>*Department of Condensed Matter Physics, University of Barcelona, Carrer de Martí i Franqués 1, Barcelona 08028, Spain*

<sup>#</sup>*Institute of Complex Systems (UBICS), University of Barcelona, Carrer de Martí i Franqués 1, Barcelona, 08028, Spain*

<sup>@</sup>*Institut Laue-Langevin, 71 avenue des Martyrs, Grenoble 38000, France*

E-mail: emanuela.zaccarelli@cnr.it

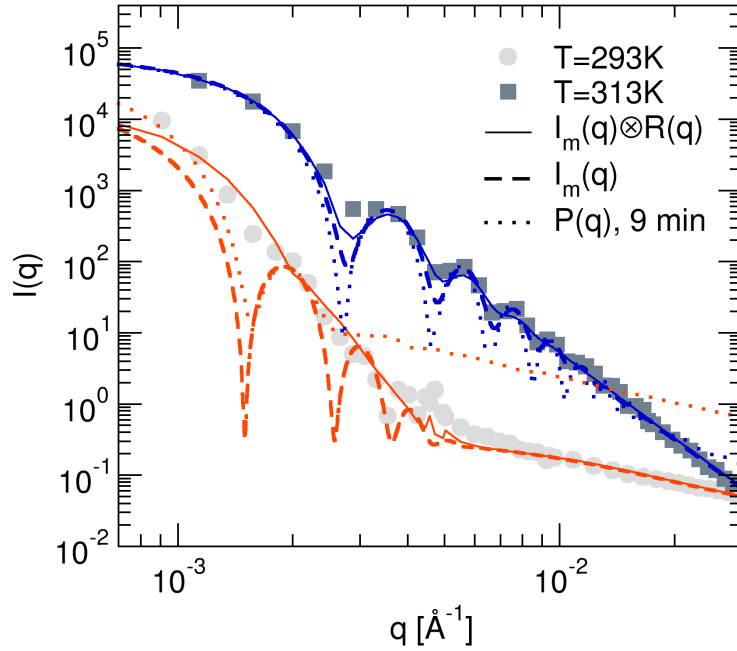

Figure S1: Experimental scattering intensity measured on the D22 diffractometer for microgels synthesised in the absence of surfactants in  $D_2O$  with KPS added in  $t_{add} = 9$  min in the collapsed (313 K, dark gray squares) and in the swollen (293 K, light gray circles) state. Thin solid lines represent the best fits obtained as described in the main text and the resolution-free  $I_m(q)$  curves are shown as thick dashed lines. Dotted lines are for simulations with the same model described in the main text for  $t_{add} = 9$  min.

Table S1: Structural parameters obtained from the analysis of the SANS data, measured at 293 K and 313 K, for the microgels synthesised in the absence of surfactants in  $D_2O$  with KPS added in  $t_{add} = 9$  min.

| T [K] | $t_{add}$ [min] | $R$ [nm]     | $\sigma_f$ [nm] | $R + 2\sigma_f$ [nm] | $R / (R + 2\sigma_f)$ |
|-------|-----------------|--------------|-----------------|----------------------|-----------------------|
| 293   | 9.0             | $300 \pm 50$ | $40 \pm 5$      | $380 \pm 60$         | $0.79 \pm 0.03$       |
| 313   | 9.0             | $170 \pm 3$  | 0               | $170 \pm 3$          | 1                     |

Table S2: Structural parameters obtained from the analysis of the SANS data, measured at 293 K and 313 K, for the microgels synthesised in the presence of surfactants in  $D_2O$  with KPS added at different  $t_{add}$  times.

| T [K] | $t_{add}$ [min] | $R$ [nm]     | $\sigma_f$ [nm] | $R + 2\sigma_f$ [nm] | $R / (R + 2\sigma_f)$ |
|-------|-----------------|--------------|-----------------|----------------------|-----------------------|
| 293   | 0.2             | $250 \pm 10$ | $32 \pm 6$      | $310 \pm 20$         | $0.80 \pm 0.03$       |
| 293   | 1.0             | $173 \pm 4$  | $28 \pm 4$      | $230 \pm 10$         | $0.76 \pm 0.03$       |
| 293   | 9.0             | $155 \pm 4$  | $32 \pm 5$      | $220 \pm 10$         | $0.71 \pm 0.03$       |
| 313   | 0.2             | $112 \pm 2$  | 0               | $112 \pm 2$          | 1                     |
| 313   | 1.0             | $96 \pm 1$   | 0               | $96 \pm 1$           | 1                     |
| 313   | 9.0             | $86 \pm 1$   | 0               | $86 \pm 1$           | 1                     |

Table S3: First- ( $\Gamma_1$ ) and second-order ( $\Gamma_2$ ) coefficients determined from the analysis of the intensity autocorrelation functions for the DLS data measured at 293 K and 313 K for microgels synthesized in the presence of surfactants, with KPS added at different  $t_{add}$  times. The parameters were obtained using the relation  $g_2(t) - 1 = Ae^{-2\Gamma_1 t(1 + \Gamma_2 t^2)^2}$ , where  $A$  is a scale factor.<sup>1</sup> In this framework, the polydispersity index (PDI) is calculated as  $PDI = \frac{\Gamma_2}{\Gamma_1^2}$ . These results, which align well with the analysis performed using the stretched exponential function described in the main text, indicate that the samples are monodisperse in both the swollen and collapsed states.

| $t_{add}$ [min] | $\Gamma_1^{293K}$ [ $s^{-1}$ ] | $\Gamma_2^{293K}$ [ $s^{-1}$ ] | $PDI^{293K}$ | $\Gamma_1^{313K}$ [ $s^{-1}$ ] | $\Gamma_2^{313K}$ [ $s^{-1}$ ] | $PDI^{313K}$ |
|-----------------|--------------------------------|--------------------------------|--------------|--------------------------------|--------------------------------|--------------|
| 0.2             | 273                            | 3025                           | 0.04         | 1019                           | 14714                          | 0.01         |
| 0.5             | 263                            | 762                            | 0.01         | 1025                           | 22310                          | 0.02         |
| 1               | 305                            | 997                            | 0.01         | 1159                           | 5753                           | 0.004        |
| 4               | 344                            | 1975                           | 0.02         | 1288                           | 33601                          | 0.02         |
| 9               | 375                            | 3383                           | 0.02         | 1277                           | 10624                          | 0.006        |

Table S4: Inverse of the first-order coefficient ( $1/\Gamma_1$ ) and relaxation time ( $\tau$ ) determined from DLS measurements at 293 K and 313 K for microgels synthesized with KPS added at different  $t_{add}$  times. The overlap of these two quantities indicates that the sample can be considered monodisperse.

| $t_{add}$ [min] | $1/\Gamma_1^{293K}$ [s] | $\tau^{293K}$ [s] | $1/\Gamma_1^{313K}$ [s] | $\tau^{313K}$ [s]     |
|-----------------|-------------------------|-------------------|-------------------------|-----------------------|
| 0.2             | 0.00366                 | 0.00372           | $9.80 \times 10^{-4}$   | $9.82 \times 10^{-4}$ |
| 0.5             | 0.00379                 | 0.00366           | $9.75 \times 10^{-4}$   | $9.84 \times 10^{-4}$ |
| 1               | 0.00328                 | 0.00320           | $8.62 \times 10^{-4}$   | $8.64 \times 10^{-4}$ |
| 4               | 0.00290                 | 0.00284           | $7.75 \times 10^{-4}$   | $7.78 \times 10^{-4}$ |
| 9               | 0.00266                 | 0.00270           | $7.82 \times 10^{-4}$   | $7.88 \times 10^{-4}$ |

## References

- (1) B. J. Frisken, *Applied Optics*, 2001, **40**, 4087–4091.
